# Supplementary material for: Caregiver willingness to give TPT to children living with drug-resistant TB patients
Source: PubMed Central journal article supplement (PMC9524515; doi:10.5588/ijtld.21.0760), 2022-10-01
Supplement: iutld_ijtld_21.0760_supplementarydata1.pdf [file iutld_ijtld_21.0760_supplementarydata1.pdf]

# Caregiver willingness to give TPT to children living with drugresistant TB patients

Supplementary S1 Figure: Flow Diagram of patients approached for study participation

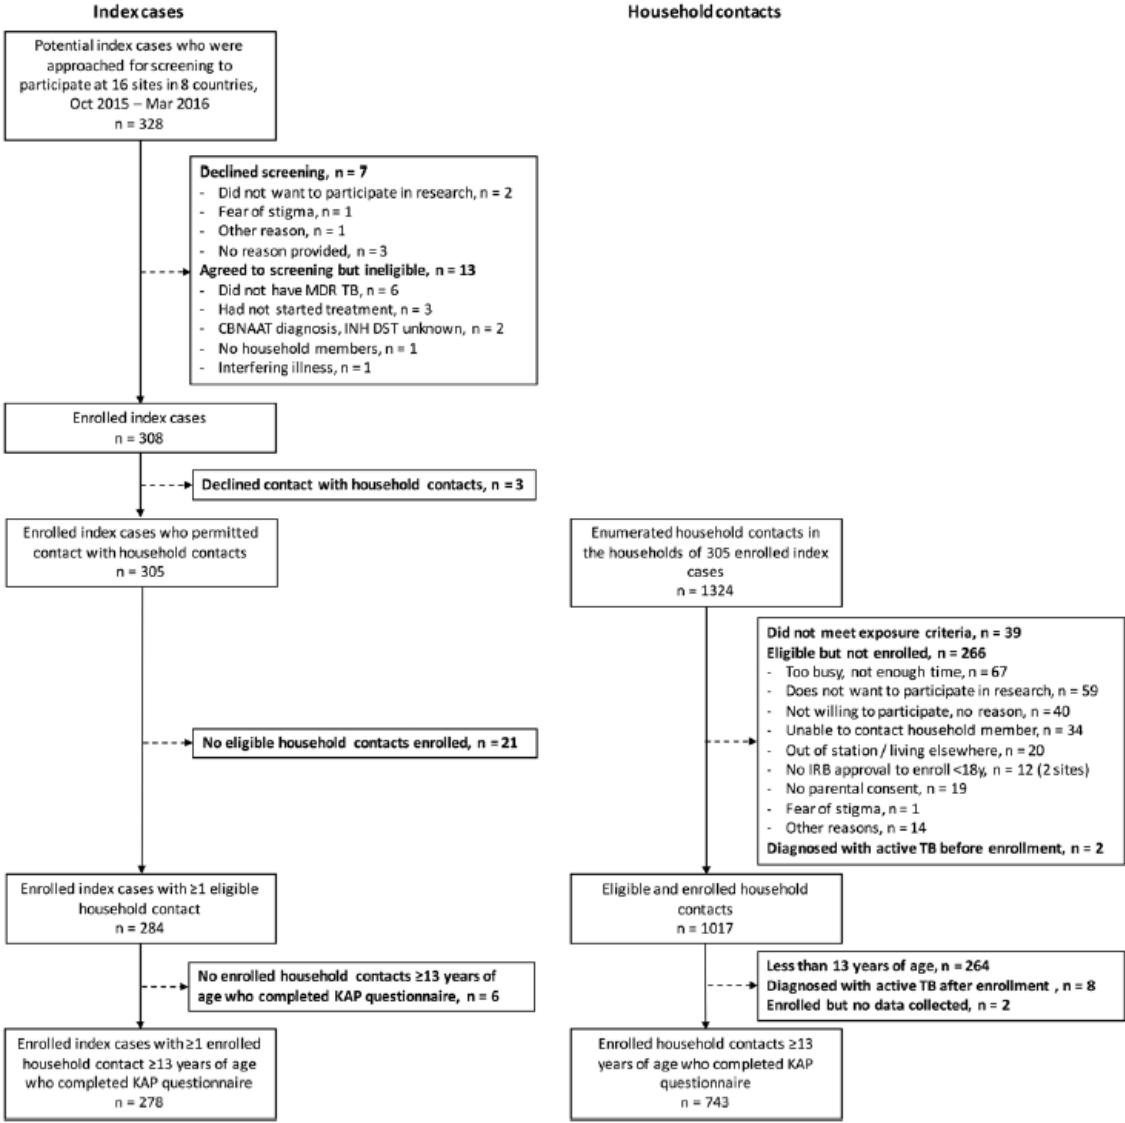

**Supplementary Table S1:** Sensitivity analyses of unadjusted associations between caregiver factors and their willingness to give their dependents a newly developed MDR TB preventive therapy

| Covariates                                                               | All caregivers (n = 299) |                       |                  | Sensitivity Analyses: Household Contact <5 years of age                    |                      |                  |                                                                          |                     |                  | Sensitivity Analyses: Household Contact 5-15 years of age                    |                      |                  |                                                                            |                       |                  |
|--------------------------------------------------------------------------|--------------------------|-----------------------|------------------|----------------------------------------------------------------------------|----------------------|------------------|--------------------------------------------------------------------------|---------------------|------------------|------------------------------------------------------------------------------|----------------------|------------------|----------------------------------------------------------------------------|-----------------------|------------------|
|                                                                          |                          |                       |                  | Restrict to ≥1 enumerated HHC <5y (n = 176)<br>Data Source: HH Enumeration |                      |                  | Restrict to reported HHC <5y (n = 159)<br>Data source: KAP Questionnaire |                     |                  | Restrict to ≥1 enumerated HHC 5-15y (n = 224)<br>Data Source: HH Enumeration |                      |                  | Restrict to reported HHC 5-15y (n = 228)<br>Data source: KAP Questionnaire |                       |                  |
|                                                                          | OR                       | 95%CI                 | p                | OR                                                                         | 95%CI                | p                | OR                                                                       | 95%CI               | p                | OR                                                                           | 95%CI                | p                | OR                                                                         | 95%CI                 | p                |
| <b>Sociodemographic Characteristics</b>                                  |                          |                       |                  |                                                                            |                      |                  |                                                                          |                     |                  |                                                                              |                      |                  |                                                                            |                       |                  |
| Age*                                                                     | 0.98                     | [0.95,1.01]           | 0.261            | 0.99                                                                       | [0.92,1.08]          | 0.900            | 1.00                                                                     | [0.92,1.08]         | 0.982            | 0.98                                                                         | [0.95,1.01]          | 0.221            | 0.98                                                                       | [0.94,1.01]           | 0.220            |
| Female gender (Ref: male)                                                | 1.50                     | [0.63,3.60]           | 0.364            | 0.52                                                                       | [0.10,2.85]          | 0.452            | 0.56                                                                     | [0.10,3.25]         | 0.515            | 1.52                                                                         | [0.63,3.67]          | 0.347            | 1.49                                                                       | [0.61,3.66]           | 0.386            |
| Secondary education or greater (Ref: none / primary)                     | 1.36                     | [0.49,3.75]           | 0.550            | 2.31                                                                       | [0.52,10.27]         | 0.270            | 2.30                                                                     | [0.52,10.14]        | 0.271            | 1.30                                                                         | [0.49,3.49]          | 0.598            | 0.96                                                                       | [0.33,2.81]           | 0.938            |
| Currently employed or in school (Ref: no)                                | 0.77                     | [0.37,1.62]           | 0.497            | 1.85                                                                       | [0.37,9.15]          | 0.451            | 2.00                                                                     | [0.40,9.94]         | 0.398            | 0.83                                                                         | [0.40,1.69]          | 0.605            | 0.77                                                                       | [0.36,1.65]           | 0.507            |
| <b>Perceived Susceptibility to and Severity of MDR TB</b>                |                          |                       |                  |                                                                            |                      |                  |                                                                          |                     |                  |                                                                              |                      |                  |                                                                            |                       |                  |
| Appropriate TB knowledge (Ref: incomplete)                               | <b>5.06</b>              | <b>[2.26,11.31]</b>   | <b>&lt;0.001</b> | <b>8.75</b>                                                                | <b>[2.71,28.28]</b>  | <b>&lt;0.001</b> | <b>5.81</b>                                                              | <b>[1.82,18.54]</b> | <b>0.003</b>     | <b>4.79</b>                                                                  | <b>[2.12,10.82]</b>  | <b>&lt;0.001</b> | <b>4.94</b>                                                                | <b>[2.14,11.43]</b>   | <b>&lt;0.001</b> |
| Can die of MDR TB without treatment (Ref: no / don't know)               | <b>5.19</b>              | <b>[1.15,23.41]</b>   | <b>0.032</b>     | --                                                                         | --                   | --               | --                                                                       | --                  | --               | <b>6.74</b>                                                                  | <b>[1.39,32.65]</b>  | <b>0.018</b>     | <b>8.31</b>                                                                | <b>[1.62,42.67]</b>   | <b>0.011</b>     |
| Concerned about child getting MDR-TB from index case (Ref: no / neutral) | <b>4.45</b>              | <b>[1.60,12.41]</b>   | <b>0.004</b>     | 4.15                                                                       | [0.89,19.23]         | 0.069            | 4.49                                                                     | [0.97,20.74]        | 0.054            | <b>4.24</b>                                                                  | <b>[1.50,11.99]</b>  | <b>0.006</b>     | <b>3.29</b>                                                                | <b>[1.13,9.57]</b>    | <b>0.029</b>     |
| Belief that TB is a serious problem in community (Ref: no / neutral)     | 2.39                     | [0.95,5.98]           | 0.064            | 3.57                                                                       | [0.85,14.93]         | 0.082            | 3.83                                                                     | [0.91,16.08]        | 0.066            | 2.39                                                                         | [0.94,6.05]          | 0.066            | 2.25                                                                       | [0.88,5.77]           | 0.090            |
| Most people in community reject person with TB (Ref: other)              | 0.89                     | [0.30,2.62]           | 0.830            | 0.31                                                                       | [0.07,1.42]          | 0.132            | 0.38                                                                     | [0.08,1.75]         | 0.215            | 0.93                                                                         | [0.33,2.69]          | 0.900            | 1.04                                                                       | [0.32,3.37]           | 0.941            |
| <b>Barriers and Enablers to Preventive Therapy</b>                       |                          |                       |                  |                                                                            |                      |                  |                                                                          |                     |                  |                                                                              |                      |                  |                                                                            |                       |                  |
| Comfortable telling family about PT (Ref: no / neutral)                  | <b>5.47</b>              | <b>[2.09,14.32]</b>   | <b>0.001</b>     | 3.80                                                                       | [0.91,15.97]         | 0.068            | <b>6.78</b>                                                              | <b>[1.56,29.52]</b> | <b>0.011</b>     | <b>5.29</b>                                                                  | <b>[2.02,13.89]</b>  | <b>0.001</b>     | <b>5.44</b>                                                                | <b>[2.06,14.38]</b>   | <b>0.001</b>     |
| Confident in properly taking preventive therapy (Ref: no / neutral)      | <b>4.53</b>              | <b>[1.63,12.62]</b>   | <b>0.004</b>     | <b>14.21</b>                                                               | <b>[1.54,131.54]</b> | <b>0.019</b>     | 5.54                                                                     | [0.94,32.59]        | 0.058            | <b>4.35</b>                                                                  | <b>[1.61,11.71]</b>  | <b>0.004</b>     | <b>5.34</b>                                                                | <b>[2.01,14.18]</b>   | <b>0.001</b>     |
| Willing to obtain all prerequisite tests (Ref: no)                       | <b>10.23</b>             | <b>[2.73,38.29]</b>   | <b>0.001</b>     | <b>11.05</b>                                                               | <b>[1.86,65.78]</b>  | <b>0.008</b>     | 7.91                                                                     | [0.99,63.02]        | 0.051            | <b>12.08</b>                                                                 | <b>[2.87,50.78]</b>  | <b>0.001</b>     | <b>26.24</b>                                                               | <b>[6.08,113.25]</b>  | <b>&lt;0.001</b> |
| Willing to take preventive therapy self (Ref: no / not sure)             | <b>35.14</b>             | <b>[10.95,112.75]</b> | <b>&lt;0.001</b> | <b>23.90</b>                                                               | <b>[4.73,120.61]</b> | <b>&lt;0.001</b> | <b>19.60</b>                                                             | <b>[3.88,98.93]</b> | <b>&lt;0.001</b> | <b>32.42</b>                                                                 | <b>[9.69,108.46]</b> | <b>&lt;0.001</b> | <b>39.53</b>                                                               | <b>[10.91,143.29]</b> | <b>&lt;0.001</b> |
| <b>Medical and Social History</b>                                        |                          |                       |                  |                                                                            |                      |                  |                                                                          |                     |                  |                                                                              |                      |                  |                                                                            |                       |                  |
| Any current TB-related symptoms (Ref: no)                                | 0.70                     | [0.28,1.77]           | 0.453            | 0.68                                                                       | [0.17,2.72]          | 0.590            | 0.59                                                                     | [0.15,2.35]         | 0.451            | 0.70                                                                         | [0.29,1.70]          | 0.428            | 0.65                                                                       | [0.25,1.70]           | 0.377            |
| Alcohol use in past 12m (Ref: no / refused to answer)                    | 1.42                     | [0.48,4.24]           | 0.529            | --                                                                         | --                   | --               | --                                                                       | --                  | --               | 1.56                                                                         | [0.51,4.76]          | 0.438            | 1.35                                                                       | [0.45,4.04]           | 0.593            |
| Drug use: ever used in past 12m (Ref: no / refused to answer)            | 1.32                     | [0.36,4.79]           | 0.676            | --                                                                         | --                   | --               | --                                                                       | --                  | --               | 1.49                                                                         | [0.43,5.21]          | 0.529            | 1.46                                                                       | [0.44,4.77]           | 0.535            |
| Previously treated for TB (Ref: no / unknown)                            | 1.22                     | [0.36,4.13]           | 0.754            | --                                                                         | --                   | --               | --                                                                       | --                  | --               | 1.26                                                                         | [0.38,4.17]          | 0.704            | 1.20                                                                       | [0.36,3.96]           | 0.764            |

\*Age = continuous variable

-- = inadequate sample size for analysis
